# Supplementary material for: The impact of glycemic status on radiological manifestations of pulmonary tuberculosis in diabetic patients
Source: PLoS One. 2017 Jun 19;12(6):e0179750. doi: 10.1371/journal.pone.0179750 (PMC5476287; doi:10.1371/journal.pone.0179750)
Supplement: S4 Table — Raw data. Excel table containing gender, age, smoking status, HbA1c level, and thoracic CT scan findings of diabetic PTB patients dividing into controlled with HbA1C < 8% and uncontrolled with HbA1C > 8%. (XLSX) [file pone.0179750.s004.xlsx]

## Sheet: HbA1c <=8%
	Demographics					Unusual							Usual					Location			Distribution
		Gender				Primary TB			Others
Case No.	HbA1C (%)	Male	Female	Age	Ever smoking	Segmental or lobar consolidation	LAP (short-axis diameter > 10mm)	Pleural effusion	Miliary lesions	Pericardial effusion	Large noncavitary nodules/masses (>1cm)	> 1 cavity in one lesion	Centrilobular nodules	Tree-in-bud opacities	Single cavitary nodule/mass	Satellite nodules	Acinar or lobular nodules	Usual predominant	Unusual predominant	Mixed	All lobes involvement
5	7.2	1		53	1			1		1			1	1	1	1	1			1	1
6	6.8		1	58	1						1		1	1					1
8	6.4	1		60	1	1													1
10	6.5	1		64	1								1	1			1	1
13	6.5	1		83		1	1	1										1
16	7	1		53	1								1	1	1	1	1	1
21	7.2	1		74	1												1		1
22	5.7	1		56	1									1	1	1	1	1
25	7.6		1	87									1	1		1	1			1	1
26	6.8		1	42									1	1				1
28	6.9		1	66	1		1						1		1	1	1	1
30	7.8	1		62		1									1	1	1			1
33	6.8		1	77		1		1											1
34	7.7	1		76	1	1		1					1			1	1			1	1
36	7.6	1		81									1	1			1			1	1
38	7.8	1		76		1							1	1		1	1	1
41	7.6	1		72	1	1	1	1					1	1		1	1			1	1
43	6.5	1		53		1					1								1
47	6.1		1	70							1		1	1		1	1	1
53	6.7	1		82		1							1	1					1		1
54	5.8	1		86											1	1	1	1
55	6.2		1	88		1													1
56	6.9	1		93	1	1		1												1
57	7.8	1		95		1								1	1		1			1	1
63	7.1	1		76	1						1					1	1	1
64	7.7	1		87		1													1		1
67	6.2	1		93	1	1											1			1
70	7.5		1	83				1						1			1			1
74	6.4		1	80									1	1				1
75	6.7	1		88			1										1		1
76	5.5	1		87				1					1	1				1
82	7.9	1		63	1						1					1		1
83	6.2	1		81				1												1
84	7.3	1		86				1									1	1
85	7.1	1		84	1						1		1	1			1	1
86	6.6	1		62	1										1			1
88	6.3	1		49	1								1	1	1	1	1	1			1
92	5.4	1		29							1			1		1	1	1
93	8	1		77		1						1					1			1
96	5.6		1	84		1						1		1					1
97	6.3	1		71	1									1			1	1
98	5.8	1		86										1	1		1			1	1
100	6.8	1		85	1	1		1						1						1	1
105	6.8	1		87									1				1	1
108	7.9	1		62	1	1					1			1	1		1	1			1
110	7		1	64		1		1				1	1	1		1	1			1	1
111	7.9	1		49	1						1		1		1		1	1
113	7.2	1		64											1			1
118	7.9	1		50	1						1								1
120	6.4	1		75		1		1					1	1		1	1			1	1
123	8	1		86	1	1			0								1			1	1
		40	11		23	21	4	13	0	1	10	3	21	26	13	17	32	23	11	17	15

## Sheet: HbA1c >8%
	Demographics					Unusual findings							Usual findings					Location			Distribution
		Gender				Primary TB			Others
Case No.	HbA1C (%)	Male	Female	Age	Ever smoking	Segmental or lobar consolidation	LAP (short-axis diameter > 10mm)	Pleural effusion	Miliary lesions	Pericardial effusion	Large noncavitary nodules/masses (>1cm)	> 1 cavity in one lesion	Centrilobular nodules	Tree-in-bud opacities	Single cavitary nodule/mass	Satellite nodules	Acinar or lobular nodules	Usual predominant	Unusual predominant	Mixed	All lobes involvement
1	12.9	1		89		1		1		1	1	1		1	1		1			1	1
2	8.8	1		76	1												1	1
3	10.6	1		80			1	1			1						1			1
4	11.1	1		92				1	1					1			1			1	1
7	11.2	1		66	1	1		1					1						1
9	8.2	1		64	1									1				1
11	16.2	1		33	1	1											1		1		1
12	11.4	1		70							1						1			1
14	9.4	1		55	1	1	1	1				1	1	1			1			1	1
15	9.5	1		94	1	1	1	1			1						1			1	1
17	9.9	1		62											1	1		1
18	8.5		1	48		1		1									1		1		1
19	12.9		1	52								1			1					1	1
20	12		1	63	1		1				1	1		1	1	1	1	1
23	9.3	1		57	1		1	1						1		1	1		1
24	11.6	1		37	1	1						1		1	1		1			1	1
27	9.4	1		87			1	1									1		1
29	11.3	1		74										1	1	1	1	1
31	14.5	1		71	1	1	1	1			1		1	1		1			1		1
32	10.5		1	94			1						1	1		1	1			1
35	13.3	1		39											1	1		1
37	10.9	1		67			1					1	1	1	1	1	1			1
39	8.2	1		50			1	1		1			1	1			1		1		1
40	14.8		1	75	1									1	1		1			1	1
42	11.4	1		48							1			1	1	1	1	1
44	9.6	1		59	1						1	1	1	1	1	1	1			1
45	10.1	1		62	1	1		1	1				1	1			1			1	1
46	8.3	1		64		1	1				1			1		1	1		1		1
48	8.3		1	71	1				1											1	1
49	9.1		1	72		1													1
50	8.4		1	77			1		1		1				1		1			1	1
51	10.1		1	77		1								1			1		1
52	10.8	1		82		1					1						1	1			1
58	12.8		1	80		1						1		1	1	1	1			1	1
59	8.2	1		83	1									1	1	1	1			1	1
60	9.2	1		71	1										1	1		1
61	10.5	1		53		1									1		1		1		1
62	8.8		1	68			1	1					1				1			1	1
65	8.6	1		70	1											1	1	1
66	8.9	1		79	1	1		1									1			1
68	9.6		1	61							1			1		1			1
69	15.9		1	67		1					1	1		1		1	1		1		1
71	8.8	1		57								1		1			1	1
72	11.7	1		54									1	1	1	1	1	1			1
73	8.6		1	92		1											1	1
77	8.4	1		81				1								1	1	1
78	9	1		81	1	1		1						1		1	1	1
79	11.4	1		86	1							1		1				1
80	14.4	1		55		1		1				1		1		1			1
81	8.1	1		78		1														1	1
87	13.1	1		43	1	1		1					1	1		1	1			1
89	9.5	1		57		1	1	1		1	1	1	1	1	1	1	1			1	1
90	8.4	1		84										1		1	1	1
91	11.8	1		58	1		1				1	1	1	1	1	1	1	1			1
94	8.3	1		88	1	1		1								1	1			1	1
95	12.9	1		50		1					1	1	1				1			1	1
99	12.2	1		72	1	1					1						1	1
101	11.1	1		62		1						1	1	1		1	1		1
102	10.2	1		59							1								1
103	15.4	1		50	1	1					1	1	1	1		1	1			1	1
104	13.1	1		69	1	1	1	1				1	1	1		1	1		1
106	9.7	1		82		1							1	1	1	1	1		1
107	8.9	1		83		1							1						1
109	9.8	1		71		1					1	1	1	1		1	1			1	1
112	9	1		73	1	1			1		1		1	1	1		1			1	1
114	12.2	1		89		1		1			1	1	1	1	1	1	1			1	1
115	9.8	1		86	1									1			1			1
116	13.1	1		70							1					1		1
117	9.5	1		89	1	1						1		1			1	1			1
119	11.4	1		65	1	1					1	1	1	1			1			1	1
121	10.4		1	69	1	1		1		1				1			1			1	1
122	9.1	1		60		1	1	1			1	1		1	1	1	1			1	1
		57	15		31	38	17	24	5	4	25	23	23	43	23	34	56	21	19	32	35
